# Supplementary material for: π-Donor olefin substituents alter olefin binding to CpFe(CO)2+
Source: Royal Society of Chemistry journal article supplement (doi:10.1039/b305252d), 2003-01-01
Supplement: b305252d.pdf [file b305252d.pdf]

Supplemental information for

**?-donor Olefin Substituents Alter Olefin Binding to  $\text{CpFe}(\text{CO})_2^+$**

**Lori A. Watson, Bethany Franzman, John C. Bollinger, and Kenneth G. Caulton\***

**Table 1.** Selected Distances (Å) and Angles (deg) for CpFe(CO)<sub>2</sub>[H<sub>2</sub>CCHNMe<sub>2</sub>]<sup>+</sup>

|       |       |       | <u>X-ray</u> | <u>DFT</u> |
|-------|-------|-------|--------------|------------|
| Fe(1) | C(2)  |       | 2.0903(9)    | 2.109      |
| Fe(1) | C(3)  |       | 2.0980(10)   | 2.113      |
| Fe(1) | C(4)  |       | 2.1100(10)   | 2.126      |
| Fe(1) | C(5)  |       | 2.1230(10)   | 2.147      |
| Fe(1) | C(6)  |       | 2.0988(10)   | 2.125      |
| Fe(1) | C(7)  |       | 1.7675(10)   | 1.766      |
| Fe(1) | C(9)  |       | 1.7689(9)    | 1.760      |
| Fe(1) | C(11) |       | 2.1143(10)   | 2.113      |
| Fe(1) | C(12) |       | 2.823(11)    | 2.799      |
| C(2)  | C(3)  |       | 1.4041(14)   | 1.415      |
| C(2)  | C(6)  |       | 1.4334(14)   | 1.434      |
| C(3)  | C(4)  |       | 1.4243(14)   | 1.420      |
| C(4)  | C(5)  |       | 1.4139(15)   | 1.417      |
| C(5)  | C(6)  |       | 1.4143(15)   | 1.436      |
| C(7)  | O(8)  |       | 1.1449(12)   | 1.145      |
| C(9)  | O(10) |       | 1.1425(11)   | 1.149      |
| C(11) | C(12) |       | 1.4290(13)   | 1.423      |
| C(12) | N(13) |       | 1.3015(11)   | 1.315      |
| N(13) | C(14) |       | 1.4604(12)   | 1.462      |
| N(13) | C(15) |       | 1.4641(12)   | 1.463      |
| C(7)  | Fe(1) | C(9)  | 95.66(4)     | 94.6       |
| C(7)  | Fe(1) | C(11) | 87.13(4)     | 86.0       |
| C(9)  | Fe(1) | C(11) | 94.72(4)     | 94.6       |
| O(8)  | C(7)  | Fe(1) | 176.41(9)    | 179.1      |
| O(10) | C(9)  | Fe(1) | 175.48(8)    | 178.3      |
| C(12) | C(11) | Fe(1) | 103.97(6)    | 102.9      |
| N(13) | C(12) | C(11) | 127.31(8)    | 128.2      |
| C(12) | N(13) | C(14) | 123.28(8)    | 123.3      |
| C(12) | N(13) | C(15) | 120.80(8)    | 121.3      |
| C(14) | N(13) | C(15) | 115.92(7)    | 115.3      |
| C(11) | Fe(1) | C(7)  | 87.13(4)     | 86.0       |
| C(11) | Fe(1) | C(9)  | 94.72(4)     | 94.6       |

**Table 2.** Selected Distances (Å) and Angles (deg) for CpFe(CO)<sub>2</sub>[CH<sub>2</sub>CH(OEt)]<sup>+</sup>

|       |        | <u>X-ray</u> |              | <u>DFT</u> |
|-------|--------|--------------|--------------|------------|
| Fe(1) | C(2)   | 2.073(10)    |              | N/A        |
| Fe(1) | C(3)   | 2.077(7)     |              | N/A        |
| Fe(1) | C(4)   | 2.103(6)     |              | N/A        |
| Fe(1) | C(5)   | 1.792(6)     |              | 1.774      |
| Fe(1) | C(7)   | 1.849(10)    |              | 1.775      |
| Fe(1) | C(9)   | 2.109(10)    |              | 2.156      |
| Fe(1) | C(10)  | 2.402(10)    |              | 2.585      |
| C(2)  | C(3)   | 1.383(9)     |              | N/A        |
| C(3)  | C(4)   | 1.395(8)     |              | N/A        |
| C(4)  | C(4)#1 | 1.401(10)    |              | N/A        |
| C(5)  | O(6)   | 1.132(7)     |              | 1.143      |
| C(7)  | O(8)   | 1.133(13)    |              | 1.144      |
| C(9)  | C(10)  | 1.336(14)    |              | 1.391      |
| C(10) | O(11)  | 1.359(12)    |              | 1.303      |
| O(11) | C(12)  | 1.448(10)    |              | 1.460      |
| C(12) | C(13)  | 1.425(12)    |              | 1.509      |
| C(5)  | Fe(1)  | C(7)         | 89.2(5)      | 93.8       |
| C(5)  | Fe(1)  | C(9)         | 83.8(5)      | 82.9       |
| C(7)  | Fe(1)  | C(9)         | 100.1(3)     | 97.2       |
| C(5)  | Fe(1)  | C(10)        | 113.7(4)     | 111.4      |
| C(7)  | Fe(1)  | C(10)        | 85.3(5) 80.1 | 80.1       |
| C(3)  | C(2)   | C(3)#1       | 109.2(9)     | N/A        |
| C(2)  | C(3)   | C(4)         | 107.5(7)     | N/A        |
| C(3)  | C(4)   | C(4)#1       | 107.8(4)     | N/A        |
| O(6)  | C(5)   | Fe(1)        | 178.7(6)     | 178.6      |
| O(8)  | C(7)   | Fe(1)        | 174.8(11)    | 177.7      |
| C(10) | C(9)   | Fe(1)        | 85.3(8)      | 91.0       |
| C(9)  | C(10)  | O(11)        | 121.0(9)     | 121.7      |
| C(9)  | C(10)  | Fe(1)        | 61.1(6)      | 56.5       |
| C(13) | C(12)  | O(11)        | 114.2(10)    | 108.3      |

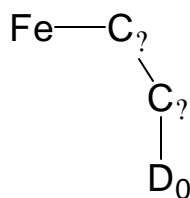

Occupancies of bonding orbitals and lone pair orbitals

| $D_0=$    | <b>F</b>          | <b>N</b>          | <b>O</b> |
|-----------|-------------------|-------------------|----------|
| $D_0-C_B$ | 1.99585           | 1.98910 + 1.95720 | 1.99350  |
| $C_B-C_a$ | 1.99387 + 1.62307 | 1.98457           | 1.98626  |
| LP $C_B$  | N/A               | N/A               | 0.78438  |
| LP $D_0$  | 1.98804           | N/A               | 1.96092  |
|           | 1.96547           |                   | 1.71971  |
|           | 1.89044           |                   |          |

Natural charge (Q)

| $D_0=$  | <b>F</b> | <b>N</b> | <b>O</b> |
|---------|----------|----------|----------|
| Q Fe    | -0.16299 | -0.15648 | -0.14524 |
| Q $C_a$ | -0.57008 | -0.68182 | -0.64036 |
| Q $C_B$ | 0.26798  | 0.15463  | 0.27859  |
| Q $D_0$ | -0.29729 | -0.33933 | -0.46819 |

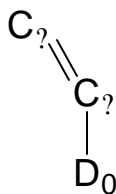

Occupancies of bonding orbitals and lone pair orbitals on the free olefin

| $D_0=$    | <b>F</b>          | <b>N</b>          | <b>O</b>          |
|-----------|-------------------|-------------------|-------------------|
| $D_0-C_B$ | 1.99640           | 1.98505           | 1.97748           |
| $C_B-C_a$ | 1.99657 + 1.99874 | 1.98899 + 1.98544 | 1.99365 + 1.99412 |
| LP $C_B$  | N/A               | N/A               | N/A               |
| LP $D_0$  | 1.99194           | 1.75413           | 1.96565           |
|           | 1.96968           |                   | 1.82567           |
|           | 1.91042           |                   |                   |

Natural charge (Q) on the free olefin

| $D_0=$  | <b>F</b> | <b>N</b> | <b>O</b> |
|---------|----------|----------|----------|
| Q $C_a$ | -0.57079 | -0.58519 | -0.61063 |
| Q $C_B$ | 0.22706  | -0.02879 | 0.12963  |
| Q $D_0$ | -0.33938 | -0.46023 | -0.53373 |
